# Supplementary material for: Safety, Tolerability, Pharmacokinetics, Target Occupancy, and Concentration‐QT Analysis of the Novel BTK Inhibitor Evobrutinib in Healthy Volunteers
Source: PubMed Central journal article supplement — Clin Transl Sci. 2019 Nov 29;13(2):325–36. doi: 10.1111/cts.12713 (PMC7070898; doi:10.1111/cts.12713), 2019-11-29
Supplement: CTS-13-325-s001.pdf [file CTS-13-325-s001.pdf]

Figure S1 Study design

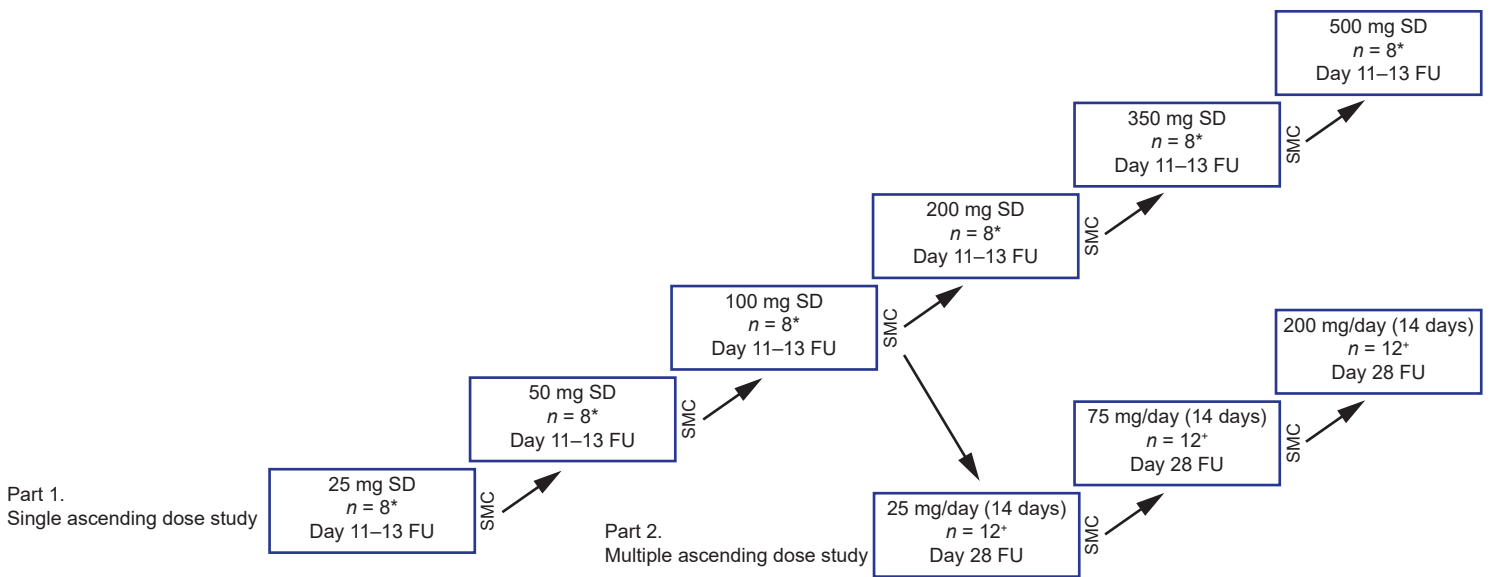

\*In each dose cohort, eight subjects were randomized 6:2 to receive a single administration of evobrutinib or placebo. The first two subjects were dosed initially with evobrutinib or placebo (1:1) on day 1, with the remainder (5:1) dosed after 24 h if safety was deemed satisfactory.

†In each dose cohort, 12 subjects were randomized 9:3 to receive a single administration of evobrutinib or placebo.

FU, follow-up; SD, single dose; SMC, Safety Monitoring Committee
