# Supplementary material for: Safety, Tolerability, Pharmacokinetics, Target Occupancy, and Concentration‐QT Analysis of the Novel BTK Inhibitor Evobrutinib in Healthy Volunteers
Source: PubMed Central journal article supplement — Clin Transl Sci. 2019 Nov 29;13(2):325–36. doi: 10.1111/cts.12713 (PMC7070898; doi:10.1111/cts.12713), 2019-11-29
Supplement: CTS-13-325-s002.pdf [file CTS-13-325-s002.pdf]

Figure S2 Relationship between QT or QTcF and heart rate

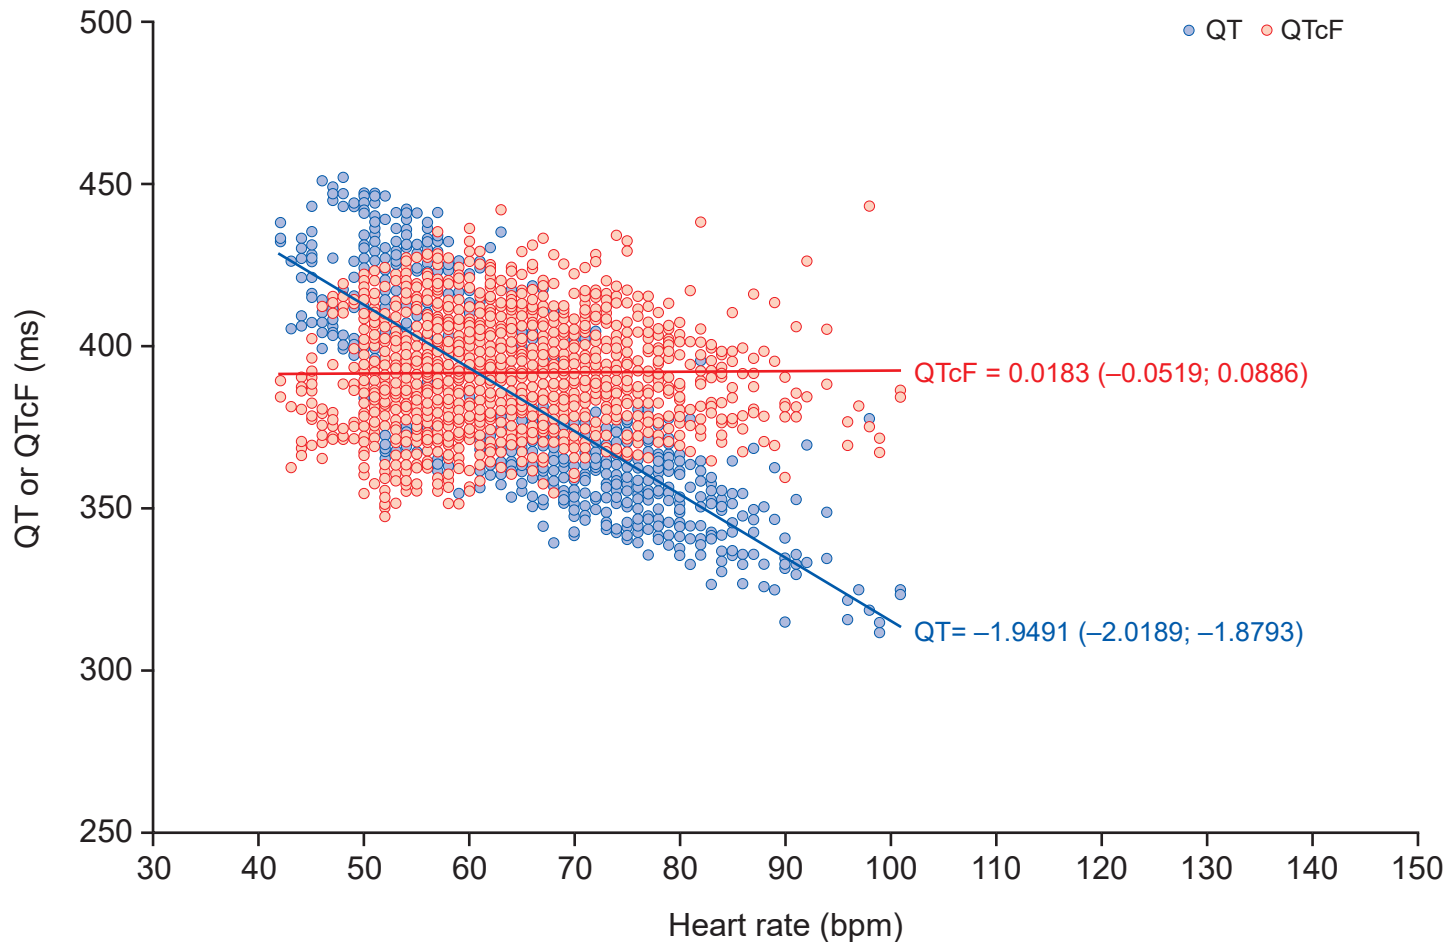

Values in line label represent slope of regression lines with two-sided 95% confidence intervals in parantheses
