# Supplementary material for: Safety, Tolerability, Pharmacokinetics, Target Occupancy, and Concentration‐QT Analysis of the Novel BTK Inhibitor Evobrutinib in Healthy Volunteers
Source: PubMed Central journal article supplement — Clin Transl Sci. 2019 Nov 29;13(2):325–36. doi: 10.1111/cts.12713 (PMC7070898; doi:10.1111/cts.12713), 2019-11-29

Figure S3 Assessment of hysteresis

A.  $\Delta$ QTcF vs. time and evobrutinib concentration versus time, superimposed

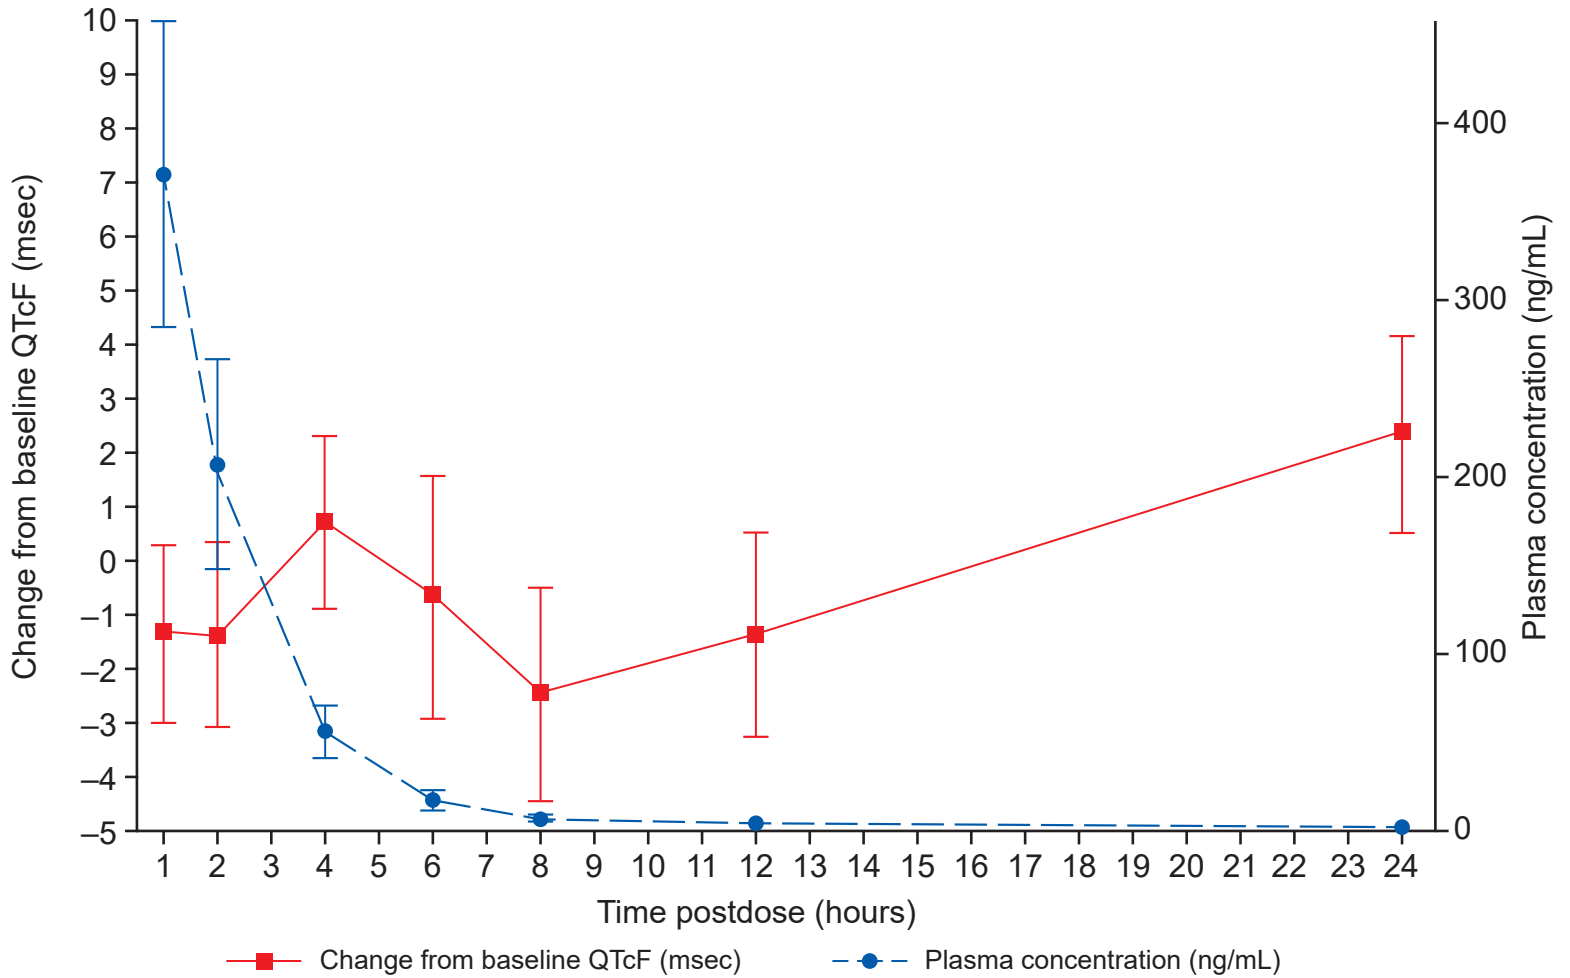

B. Mean  $\Delta$ QTcF vs. mean plasma evobrutinib concentration by time point, connected in chronological order

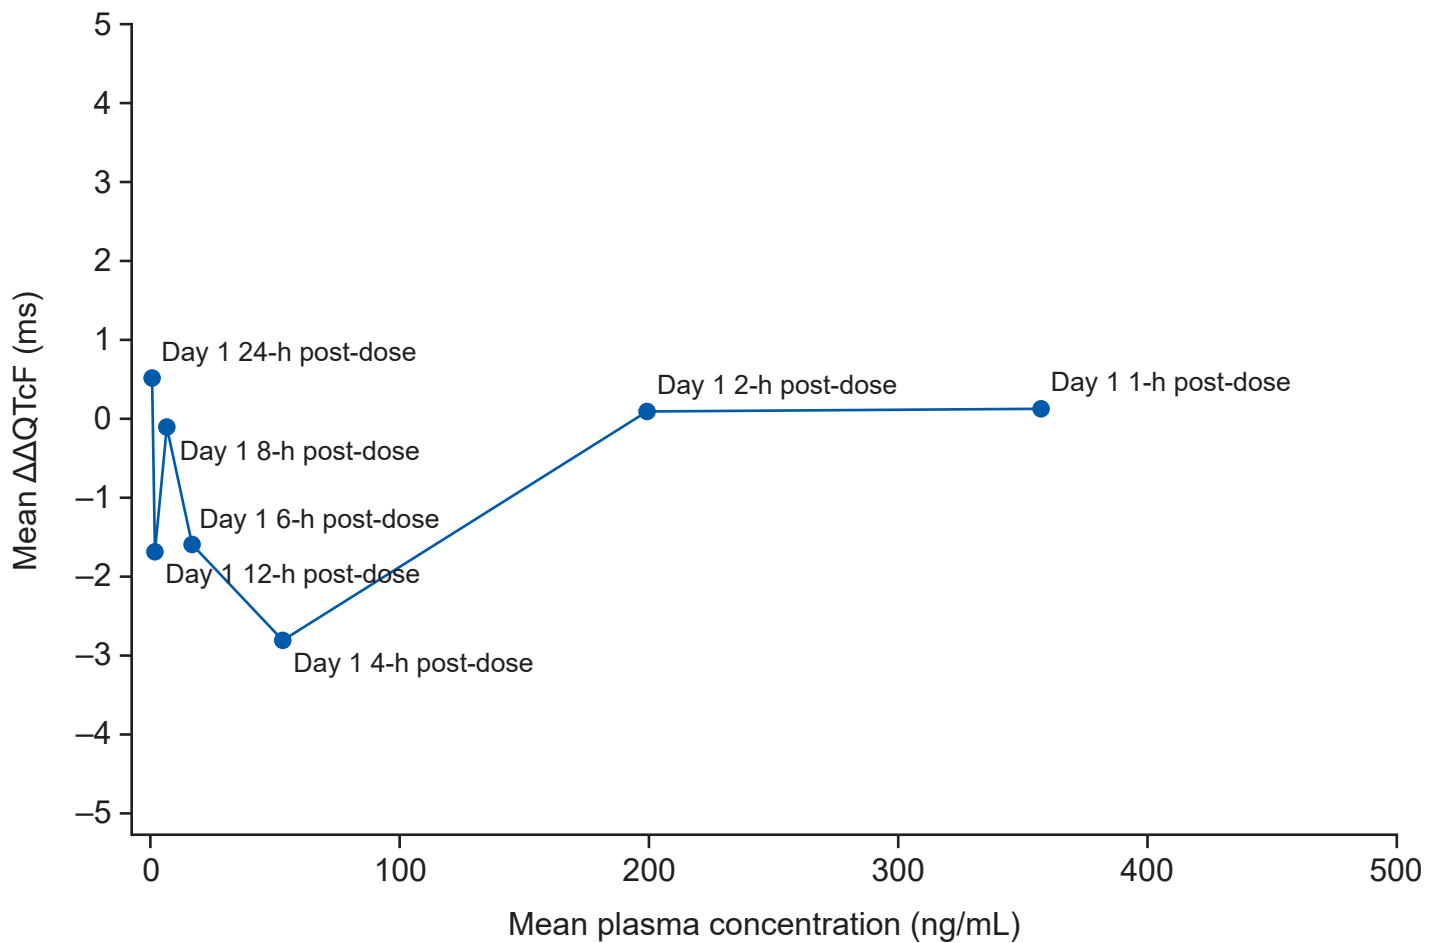

Supplement: CTS-13-325-s003.pdf [file CTS-13-325-s003.pdf]
